# Supplementary material
Source: PubMed Central journal article supplement (PMC4320261)
Supplement: mmc1.pdf [file mmc1.pdf]

The American Journal of Human Genetics

Supplemental Data

## **Mouse and Human *CRKL* Is Dosage Sensitive**

### **for Cardiac Outflow Tract Formation**

Silvia E. Racedo, Donna M. McDonald-McGinn, Jonathan H. Chung, Elizabeth Goldmuntz, Elaine Zackai, Beverly S. Emanuel, Bin Zhou, Birgit Funke, and Bernice E. Morrow

### CRKL GENOMIC SOUTHERN: *Bsp*HI digest

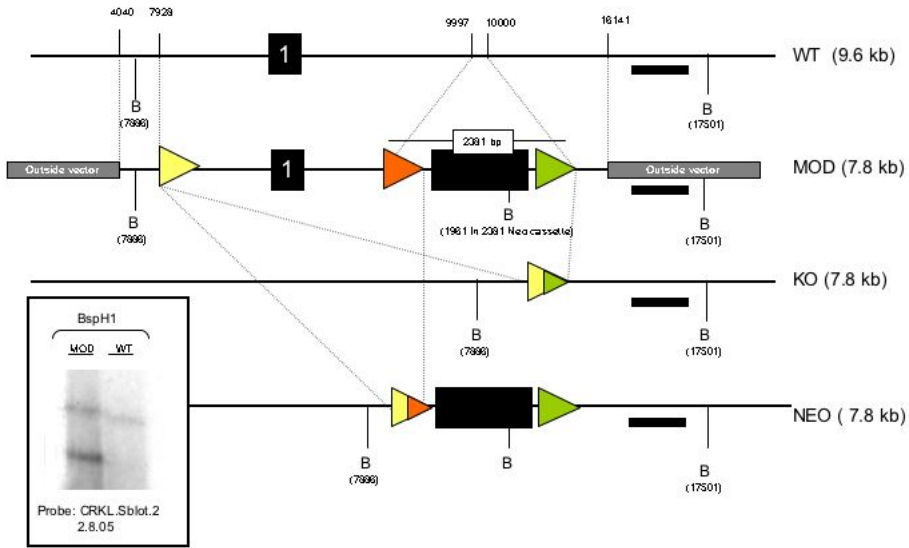

### CRKL GENOMIC SOUTHERN: *Afl*II digest

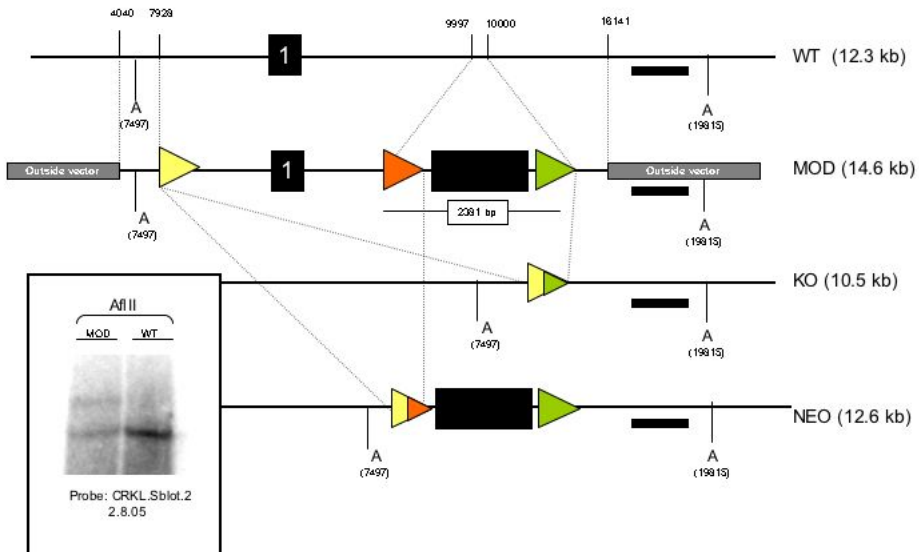

**Figure S1. *Crkl* gene targeting to generate various alleles.**

The mouse *Crkl* locus indicating the position of exon 1 is shown. The three-loxP sites are indicated as three different colors (yellow, orange and green triangles). The loxP sites flank exon 1 and either side of the Neomycin cassette (black box). The targeting construct and vector (gray boxes) are shown (MOD, 7.8 kb). Genomic Southern hybridization was performed to detect the correctly targeted *Crkl* allele. Two different digests of tail DNA was performed, one using *BspH1* (left) and the other *AflII* (right). A probe (black bar) was used outside the targeting construct, such that correct targeting could be detected. Bands of the correct targeted size were detected by genomic Southern blot hybridization.

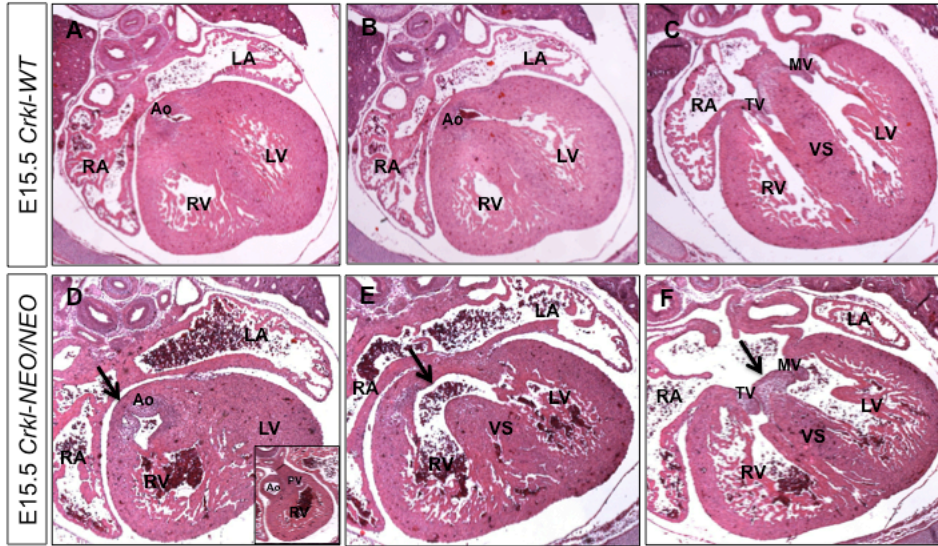

**Figure S2. Overriding aorta and ventricular septal defect in a *Crkl-NEO/NEO* embryo.**

Transverse histological sections of a *Crkl-WT* (A, B and C) versus *Crkl-NEO/NEO* embryonic mouse heart (D, E and F) at E15.5 stained with hematoxylin and eosin. Arrow (D) shows the aorta on top of RV (Ao). Inset (D) shows the aortic valve and the pulmonary valve at the same level. Arrow (E) shows a VSD and (F) denotes atrioventricular cushions with blunted valves. RA = right atrium, RV = right ventricle, LA = left atrium, LV = left ventricle, Ao = Aorta, PV = pulmonary valve, VS = ventricular septum.

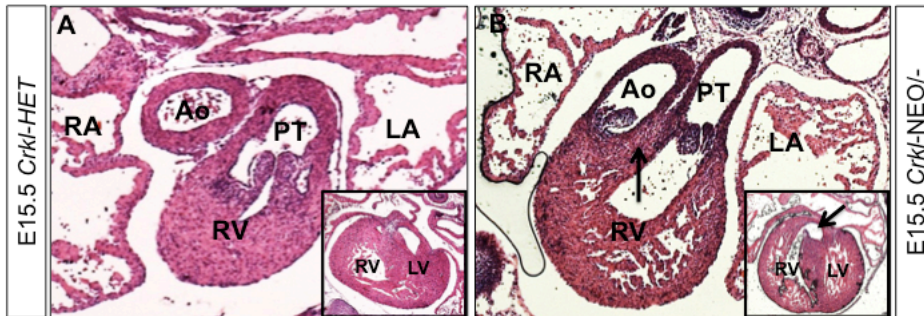

**Figure S3. Double outlet right ventricle in a *Crkl-NEO*<sup>-/-</sup> embryo.**

Transverse histological sections of the aorta and pulmonary trunk or heart (inset) in a *Crkl-HET* (A) versus *Crkl-NEO*<sup>-/-</sup> embryo (B) at E15.5 stained with hematoxylin and eosin. Normally, the aorta and pulmonary trunk do not enter the right ventricle (A). Arrow (B) shows the aorta and the pulmonary trunk connected to the RV in the *Crkl-NEO*<sup>-/-</sup> embryo. In the *Crkl-NEO*<sup>-/-</sup> embryo, a VSD is also present (arrow in inset in B), which is absent in the heterozygous embryo (inset in A). RA = right atrium, RV = right ventricle, LA = left atrium, LV = left ventricle, Ao = Aorta, PT = pulmonary trunk.

Table S1

| PATIENT ID# | DELETION TYPE | Cardiac diagnosis of new cohort of patients (probands)             |
|-------------|---------------|--------------------------------------------------------------------|
| 11701-A     | B-D           | Normal echo                                                        |
| 11702-A     | B-D           | Normal echo                                                        |
| 11707-A     | B-D           | Normal echo and MRI                                                |
| 11745-A     | B-D           | Normal Echo                                                        |
| 11762       | B-D           | TOF                                                                |
| 11772-A     | B-D           | VSD/ASD                                                            |
| 11773-A     | B-D           | PTA                                                                |
| 11782-A     | B-D           | Normal echo                                                        |
| 11783-A     | B-D           | IAAB/VSD/bicuspid aortic valve                                     |
| 11784-A     | B-D           | TOF                                                                |
| 11812-A     | B-D           | Normal echo                                                        |
| 11952-A     | B-D           | Normal echo                                                        |
| 12001       | B-D           | Normal echo                                                        |
| 12039-A     | B-D           | VSD/ASD                                                            |
| 12040-A     | B-D           | Normal echo                                                        |
| 12085-A     | B-D           | Normal echo                                                        |
| 12086       | B-D           | Normal echo                                                        |
| 12098-A     | B-D           | VSD/bicuspid aortic valve/severe discrete coarctation of the aorta |
| 12145       | B-D           | VSD                                                                |
| 12167       | B-D           | Normal echo                                                        |
| 11687       | C-D           | Normal echo                                                        |
| 11916       | C-D           | Normal echo                                                        |
| 12144       | C-D           | TOF                                                                |
| 12150       | C-D           | Normal echo                                                        |
| 12164       | C-D           | Normal echo                                                        |

**Table S1. List of patients ascertained.**

Twenty new LCR22B-D (B-D) and five LCR22C-D (C-D) probands are shown with their identification numbers and cardiac diagnoses. Echo is an abbreviation for echocardiogram. TOF, VSD, ASD, IAAB = interrupted aortic arch type B, PTA.

Table S2

| ALLELIC COMBINATION        |                       | <i>Crkl-WT</i> | <i>Crkl-NEO/+</i> | <i>Crkl-HET</i> | <i>Crkl-NEO/NEO</i> | <i>Crkl-NEO/-</i> | <i>Crkl-KO</i> |            |
|----------------------------|-----------------------|----------------|-------------------|-----------------|---------------------|-------------------|----------------|------------|
| CARDIAC PHENOTYPE<br>E15.5 |                       | n/N (%)        | n/N (%)           | n/N (%)         | n/N (%)             | n/N (%)           | n/N (%)        |            |
| OFT<br>ALIGNMENT           | OVERRIDING<br>Ao (OA) | -              | -                 | -               | 5/25 (20)           | -                 | -              |            |
|                            | DORV                  | -              | -                 | -               | 2/25 (8)            | 10/15 (67)        | 5/24 (21)      |            |
|                            | TOF                   | -              | -                 | -               | 1/25 (4)            | 3/15 (20)         | 6/24 (25)      |            |
| VENTRICLES                 | VSD                   |                | -                 | -               | -                   | 9/25 (36)         | 13/15 (87)     | 11/24 (46) |
|                            | THICKNESS             | Thick<br>RV    | -                 | -               | -                   | 1/25 (4)          | 3/15 (20)      | 6/24 (25)  |
|                            |                       | Thin<br>RV     | -                 | -               | -                   | 2/25 (8)          | 10/15 (67)     | 5/24 (21)  |
| ASD                        |                       | -              | -                 | -               | 1/25 (4)            | -                 | 1/24 (4)       |            |
| NO DEFECTS                 |                       | 23/23<br>(100) | 20/20<br>(100)    | 11/11<br>(100)  | 4/25<br>(16)        | 2/15<br>(13)      | 0/24<br>(0)    |            |

**Table S2. Cardiac phenotypes in embryonic hearts from the *Crkl* allelic series.**

The different genotypes that were generated from the different *Crkl* alleles are listed in the first row of the Table. OFT alignment defects are listed as one category. DORV; TOF. Various intracardiac defects included VSD and defects in the thickness of the myocardium, including thicker (hypertrophic) or thinner (dilated) muscular wall of the right ventricle in association with other defects. Few embryos had ASDs. Note that approximately 15% of *Crkl-NEO/NEO* or *Crkl-NEO/-* embryos had no detectable heart defects. The severity and types of defects vary among the different alleles.



**Table S3**

| Gene symbol      | HUGO gene name                                                       | Strand | cdsStart | cdsEnd   | Exon Count | LCR22 | Function                                                                                                                                            | PMID         |
|------------------|----------------------------------------------------------------------|--------|----------|----------|------------|-------|-----------------------------------------------------------------------------------------------------------------------------------------------------|--------------|
| <i>ZNF74</i>     | Zinc finger protein 74                                               | +      | 20748918 | 20759946 | 4          | B-C   | May function in RNA maturation and transcriptional regulation; present in the nuclear matrix                                                        | 1 2 ,        |
| <i>SCARF2</i>    | Scavenger receptor class F, member 2                                 | -      | 20779664 | 20792041 | 12         | B-C   | Recessive mutations cause Van Den Ende-Gupta syndrome; craniofacial features, skeletal abnormalities. Ca <sup>+</sup> binding protein in epidermis. | 3 4 ,        |
| <i>KLHL22</i>    | Kelch-like family member 22                                          | -      | 20796359 | 20843498 | 7          | B-C   | Adaptor protein that works with other proteins to regulate chromosome alignment during mitosis.                                                     | 5 6 ,        |
| <i>MED15</i>     | Mediator complex subunit 15                                          | +      | 20861965 | 20940991 | 18         | B-C   | Transcriptional coactivator in RNA polymerase II transcription; Part of Mediator complex.                                                           | 7 8 ,        |
|                  |                                                                      |        |          |          |            |       |                                                                                                                                                     |              |
| <i>PI4KA</i>     | Phosphatidylinositol 4-kinase, catalytic, alpha                      | -      | 21062334 | 21213013 | 55         | C-D   | Catalyzes first step in biosynthesis of phosphatidylinositol 4,5-bisphosphate; knockout mice show early embryonic lethality.                        | 9 10 ,       |
| <i>SERPIN D1</i> | Serpin peptidase inhibitor, clade D; also called Heparin cofactor II | +      | 21133600 | 21141354 | 5          | C-D   | Serine proteinase inhibitor that inhibits thrombin in coagulation cascade; Regulates angiogenesis                                                   | 11 12 13 , , |
| <i>SNAP29</i>    | Synaptosomal-associated protein, 29kDa                               | +      | 21213398 | 21242124 | 5          | C-D   | Synaptic vesicle membrane docking; gene for Cednik syndrome (cerebral dysgenesis, neuropathy, ichthyosis, keratoderma)                              | 14 15 ,      |

|                     |                                                                     |   |          |          |    |     |                                                                                                                                               |         |
|---------------------|---------------------------------------------------------------------|---|----------|----------|----|-----|-----------------------------------------------------------------------------------------------------------------------------------------------|---------|
| <i>CRKL</i>         | v-crkl avian sarcoma virus CT10 oncogene homolog-like               | + | 21272222 | 21304133 | 3  | C-D | Cytoplasmic adaptor to receptor tyrosine kinases; MAPK pathway                                                                                | 16 17 , |
| <i>LOC101928891</i> |                                                                     | + | 21318968 | 21318968 | 2  | C-D |                                                                                                                                               |         |
| <i>AIFM3</i>        | Apoptosis-inducing factor, mitochondrion-associated, 3; alias, AIFL | + | 21322232 | 21335320 | 21 | C-D | Target gene of miR-210, induced by hypoxia.                                                                                                   | 18      |
| <i>LZTR1</i>        | Leucine-zipper-like transcription regulator 1                       | + | 21336660 | 21351637 | 21 | C-D | BTB-kelch superfamily gene, localizes to the Golgi network. Mutations (autosomal dominant with SMARCB1 mutations) cause multiple schwannomas. | 19 20 , |
| <i>THAP7</i>        | THAP domain containing 7                                            | - | 21354168 | 21356200 | 5  | C-D | Chromatin modifier; targets deacetylation of histone; recruits HDAC3                                                                          | 21 22 , |
| <i>P2RX6</i>        | Purinergic receptor P2X, ligand-gated ion channel, 6                | + | 21369463 | 21380906 | 12 | C-D | P2X receptors, ATP-gated ion channels in skeletal muscle. Associated with cadherin in endothelial cells.                                      | 23 24 , |
| <i>SLC7A4</i>       | Solute carrier family 7, member 4                                   | - | 21383343 | 21386101 | 5  | C-D | Similar to cationic amino acid transporters                                                                                                   | 25      |
| <i>LRRC74B</i>      | Leucine rich repeat containing 74B                                  | + | 21400275 | 21414817 | 10 | C-D |                                                                                                                                               |         |

**Table S3. The genes in the LCR22B-D interval.**

The gene symbol, detailed coordinates, full name, exon number, location (B-C; C-D), biological functional information from the literature are indicated.

1. Grondin, B., Cote, F., Bazinet, M., Vincent, M., and Aubry, M. (1997). Direct interaction of the KRAB/Cys2-His2 zinc finger protein ZNF74 with a hyperphosphorylated form of the RNA polymerase II largest subunit. *The Journal of biological chemistry* 272, 27877-27885.
2. Cote, F., Boisvert, F.M., Grondin, B., Bazinet, M., Goodyer, C.G., Bazett-Jones, D.P., and Aubry, M. (2001). Alternative promoter usage and splicing of ZNF74 multifinger gene produce

protein isoforms with a different repressor activity and nuclear partitioning. *DNA and cell biology* 20, 159-173.

3. Hwang, J., Kalinin, A., Hwang, M., Anderson, D.E., Kim, M.J., Stojadinovic, O., Tomic-Canic, M., Lee, S.H., and Morasso, M.I. (2007). Role of Scarf and its binding target proteins in epidermal calcium homeostasis. *The Journal of biological chemistry* 282, 18645-18653.
4. Anastasio, N., Ben-Omran, T., Teebi, A., Ha, K.C., Lalonde, E., Ali, R., Almureikhi, M., Der Kaloustian, V.M., Liu, J., Rosenblatt, D.S., et al. (2010). Mutations in SCARF2 are responsible for Van Den Ende-Gupta syndrome. *American journal of human genetics* 87, 553-559.
5. Maerki, S., Olma, M.H., Staubli, T., Steigemann, P., Gerlich, D.W., Quadroni, M., Sumara, I., and Peter, M. (2009). The Cul3-KLHL21 E3 ubiquitin ligase targets aurora B to midzone microtubules in anaphase and is required for cytokinesis. *The Journal of cell biology* 187, 791-800.
6. Beck, J., Maerki, S., Posch, M., Metzger, T., Persaud, A., Scheel, H., Hofmann, K., Rotin, D., Pedrioli, P., Swedlow, J.R., et al. (2013). Ubiquitylation-dependent localization of PLK1 in mitosis. *Nature cell biology* 15, 430-439.
7. Conaway, R.C., and Conaway, J.W. (2011). Origins and activity of the Mediator complex. *Seminars in cell & developmental biology* 22, 729-734.
8. Kim, S., and Gross, D.S. (2013). Mediator recruitment to heat shock genes requires dual Hsf1 activation domains and mediator tail subunits Med15 and Med16. *The Journal of biological chemistry* 288, 12197-12213.
9. Vaillancourt, F.H., Brault, M., Pilote, L., Uyttersprot, N., Gaillard, E.T., Stoltz, J.H., Knight, B.L., Pantages, L., McFarland, M., Breitfelder, S., et al. (2012). Evaluation of phosphatidylinositol-4-kinase IIIalpha as a hepatitis C virus drug target. *Journal of virology* 86, 11595-11607.
10. Bojjireddy, N., Botyanszki, J., Hammond, G., Creech, D., Peterson, R., Kemp, D.C., Snead, M., Brown, R., Morrison, A., Wilson, S., et al. (2014). Pharmacological and genetic targeting of the PI4KA enzyme reveals its important role in maintaining plasma membrane phosphatidylinositol 4-phosphate and phosphatidylinositol 4,5-bisphosphate levels. *The Journal of biological chemistry* 289, 6120-6132.
11. Aihara, K., Azuma, H., Akaike, M., Sata, M., and Matsumoto, T. (2009). Heparin cofactor II as a novel vascular protective factor against atherosclerosis. *Journal of atherosclerosis and thrombosis* 16, 523-531.
12. Ikeda, Y., Aihara, K., Yoshida, S., Iwase, T., Tajima, S., Izawa-Ishizawa, Y., Kihira, Y., Ishizawa, K., Tomita, S., Tsuchiya, K., et al. (2012). Heparin cofactor II, a serine protease inhibitor, promotes angiogenesis via activation of the AMP-activated protein kinase-endothelial nitric-oxide synthase signaling pathway. *The Journal of biological chemistry* 287, 34256-34263.
13. Kumar, A., Bhandari, A., Sarde, S.J., and Goswami, C. (2014). Genetic variants and evolutionary analyses of heparin cofactor II. *Immunobiology* 219, 713-728.
14. Fuchs-Telem, D., Stewart, H., Rapaport, D., Nousbeck, J., Gat, A., Gini, M., Lugassy, Y., Emmert, S., Eckl, K., Hennies, H.C., et al. (2011). CEDNIK syndrome results from loss-of-function mutations in SNAP29. *The British journal of dermatology* 164, 610-616.
15. McDonald-McGinn, D.M., Fahiminiya, S., Revil, T., Nowakowska, B.A., Suhl, J., Bailey, A., Mlynarski, E., Lynch, D.R., Yan, A.C., Bilaniuk, L.T., et al. (2013). Hemizygous mutations in SNAP29 unmask autosomal recessive conditions and contribute to atypical findings in patients with 22q11.2DS. *Journal of medical genetics* 50, 80-90.
16. Guris, D.L., Fantes, J., Tara, D., Druker, B.J., and Imamoto, A. (2001). Mice lacking the homologue of the human 22q11.2 gene CRKL phenocopy neurocristopathies of DiGeorge syndrome. *Nature genetics* 27, 293-298.
17. Moon, A.M., Guris, D.L., Seo, J.H., Li, L., Hammond, J., Talbot, A., and Imamoto, A. (2006). Crkl deficiency disrupts Fgf8 signaling in a mouse model of 22q11 deletion syndromes. *Developmental cell* 10, 71-80.

18. Yang, W., Sun, T., Cao, J., Liu, F., Tian, Y., and Zhu, W. (2012). Downregulation of miR-210 expression inhibits proliferation, induces apoptosis and enhances radiosensitivity in hypoxic human hepatoma cells in vitro. *Experimental cell research* 318, 944-954.
19. Nacak, T.G., Leptien, K., Fellner, D., Augustin, H.G., and Kroll, J. (2006). The BTB-kelch protein LZTR-1 is a novel Golgi protein that is degraded upon induction of apoptosis. *The Journal of biological chemistry* 281, 5065-5071.
20. Piotrowski, A., Xie, J., Liu, Y.F., Poplawski, A.B., Gomes, A.R., Madanecki, P., Fu, C., Crowley, M.R., Crossman, D.K., Armstrong, L., et al. (2014). Germline loss-of-function mutations in LZTR1 predispose to an inherited disorder of multiple schwannomas. *Nature genetics* 46, 182-187.
21. Macfarlan, T., Kutney, S., Altman, B., Montross, R., Yu, J., and Chakravarti, D. (2005). Human THAP7 is a chromatin-associated, histone tail-binding protein that represses transcription via recruitment of HDAC3 and nuclear hormone receptor corepressor. *The Journal of biological chemistry* 280, 7346-7358.
22. Macfarlan, T., Parker, J.B., Nagata, K., and Chakravarti, D. (2006). Thanatos-associated protein 7 associates with template activating factor-1beta and inhibits histone acetylation to repress transcription. *Molecular endocrinology* 20, 335-347.
23. Yu, Q., Zhao, Z., Sun, J., Guo, W., Fu, J., Burnstock, G., He, C., and Xiang, Z. (2010). Expression of P2X6 receptors in the enteric nervous system of the rat gastrointestinal tract. *Histochemistry and cell biology* 133, 177-188.
24. Hausmann, R., Bodnar, M., Woltersdorf, R., Wang, H., Fuchs, M., Messemer, N., Qin, Y., Gunther, J., Riedel, T., Grohmann, M., et al. (2012). ATP binding site mutagenesis reveals different subunit stoichiometry of functional P2X2/3 and P2X2/6 receptors. *The Journal of biological chemistry* 287, 13930-13943.
25. Wolf, S., Janzen, A., Vekony, N., Martine, U., Strand, D., and Closs, E.I. (2002). Expression of solute carrier 7A4 (SLC7A4) in the plasma membrane is not sufficient to mediate amino acid transport activity. *The Biochemical journal* 364, 767-775.
